# Supplementary material for: A 1985–2023 time series dataset of absolute reservoir storage in Mainland Southeast Asia (MSEA-Res)
Source: Copernicus journal article supplement (doi:10.5194/essd-2024-441), 2024-10-10
Supplement: Supplementary file 1 [file essd-2024-441-supplement.pdf]

# A 1985-2023 time series dataset of absolute reservoir storage in Mainland Southeast Asia (MSEA-Res)

Shanti Shwarup Mahto<sup>1\*</sup>, Simone Fatichi<sup>1</sup>, and Stefano Galelli<sup>2</sup>

<sup>1</sup>Department of Civil and Environmental Engineering, National University of Singapore, 117576, Singapore

<sup>2</sup>School of Civil and Environmental Engineering, Cornell University, Ithaca, NY 14853, USA

\*Correspondence to: Shanti Shwarup Mahto ([ss.mahto@nus.edu.sg](mailto:ss.mahto@nus.edu.sg))

## Supplementary information

### Figures

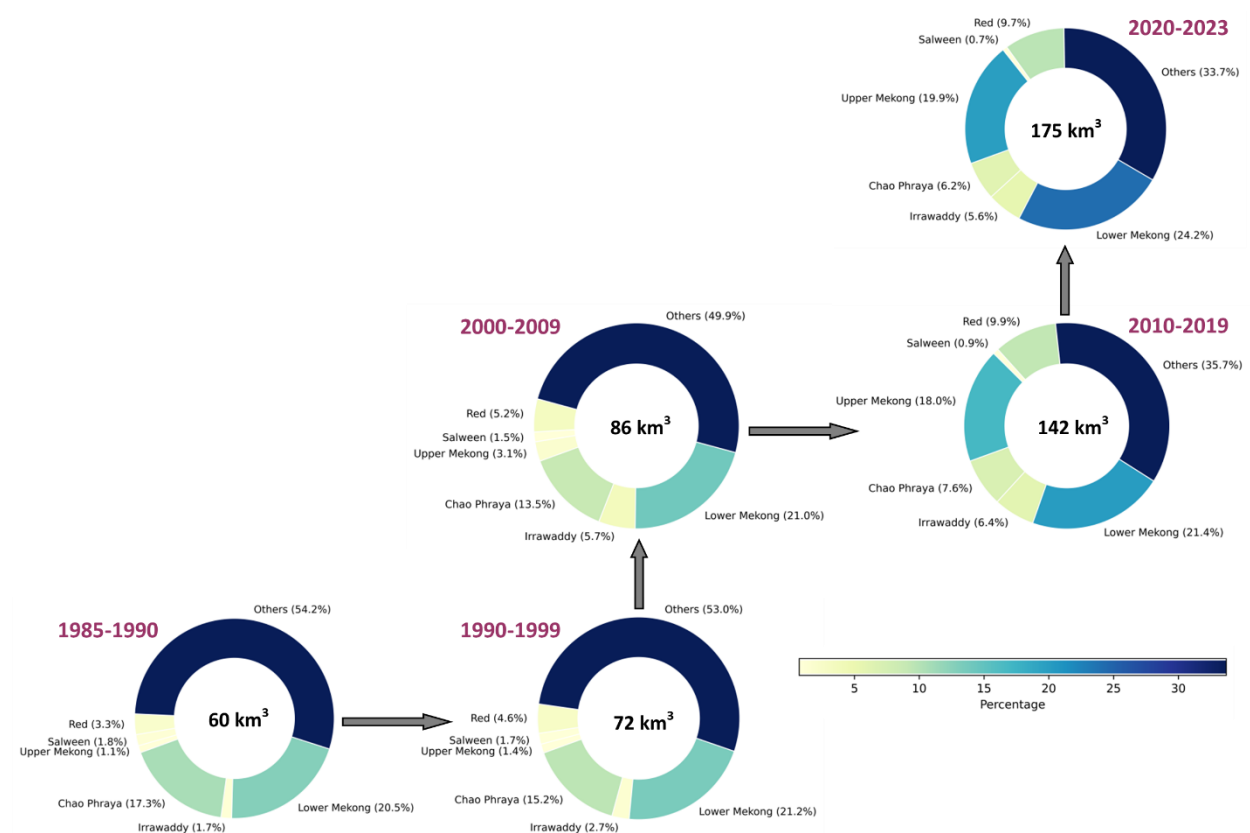

Figure S1: Change in total reservoir storage in Mainland Southeast Asia between 1985 and 2023. The value at the center of each pie-chart shows the average reservoir storage in that period, while the color division represents the percentage contribution of reservoir storage from each major basin.

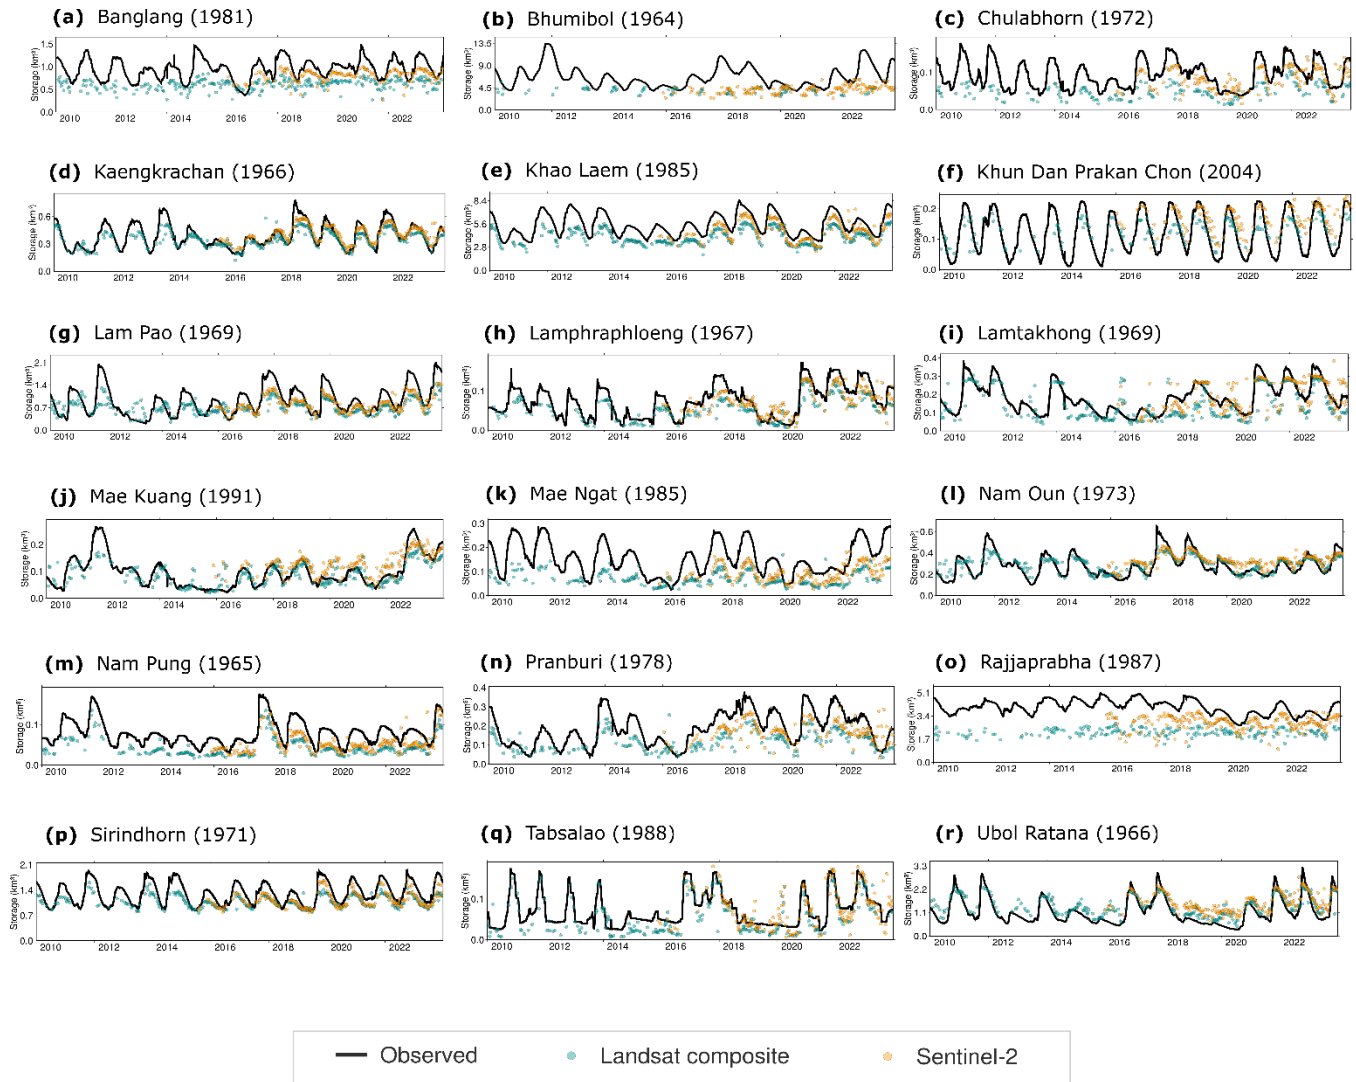

**Figure S2: Direct validation of the storage time series against observed storage for eighteen different reservoirs in Thailand. All reservoirs were built before 2000, with the exception of Khun Dan Prakan Chao.**

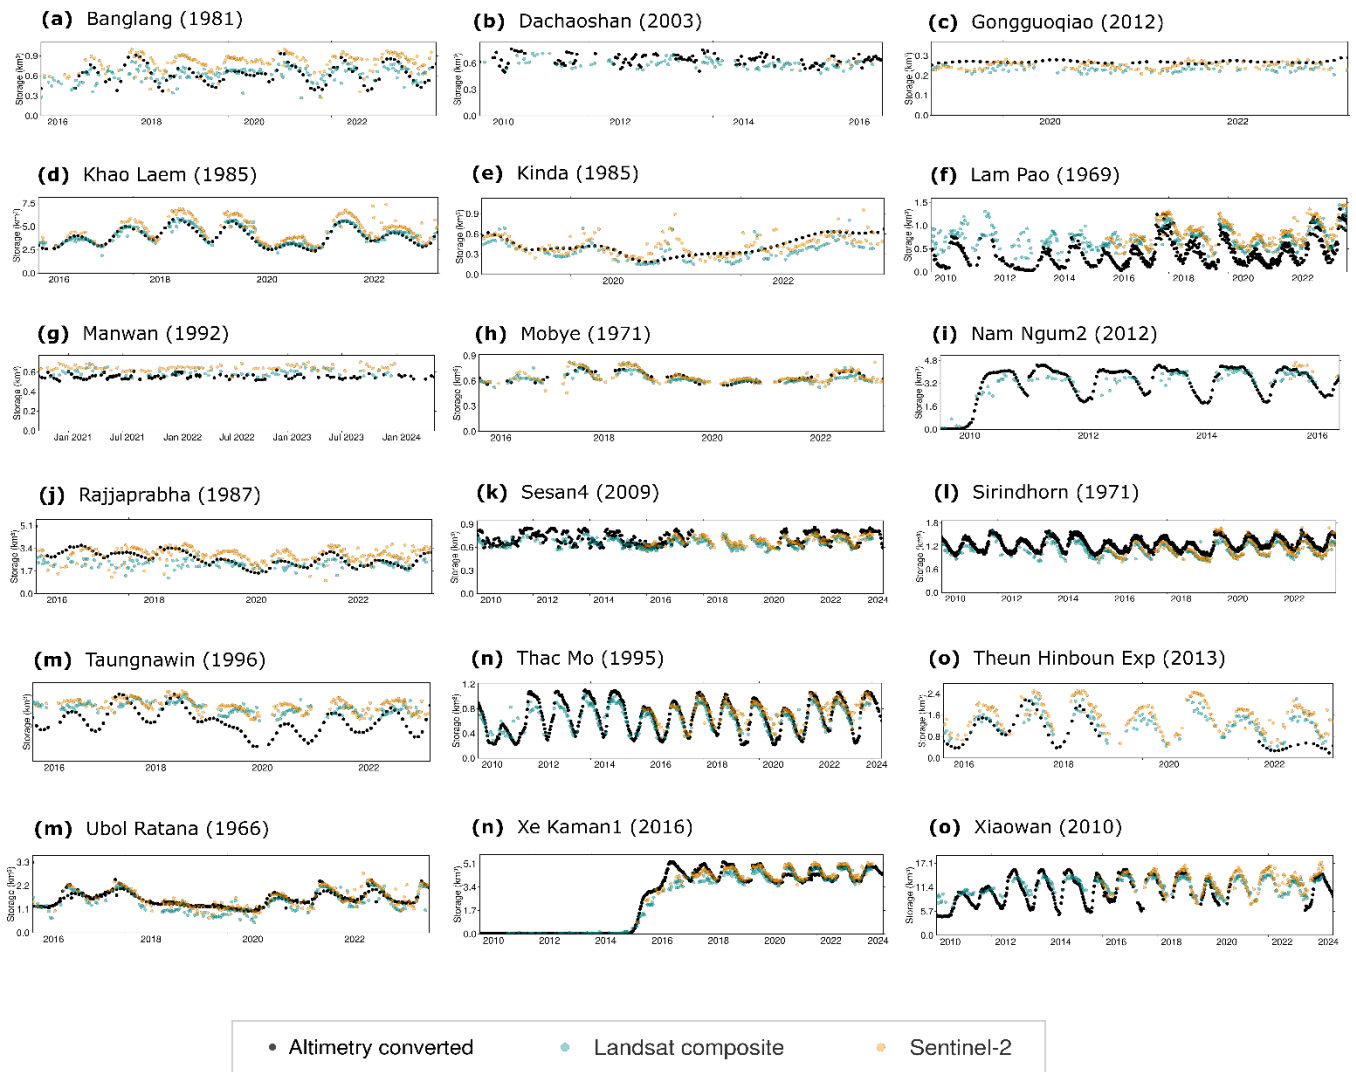

**Figure S3: Indirect validation of the storage time-series against altimetry-converted storage for eighteen different reservoirs across Mainland Southeast Asia.**

## Tables

Table S1. List of reservoirs used in the direct validation and corresponding validation performance. Note that the reservoirs are listed in decreasing order of R<sup>2</sup>.

| Name of the reservoir | Year of commission | Longitude | Latitude | R <sup>2</sup> | nRMSE (%) |
|-----------------------|--------------------|-----------|----------|----------------|-----------|
| Sirindhorn            | 1971               | 105.389   | 15.133   | 0.88           | 14.36     |
| Srinagarind           | 1978               | 99.0648   | 14.5122  | 0.8            | 7.43      |
| Ubol_Ratana           | 1966               | 102.587   | 16.758   | 0.8            | 13.15     |
| Sirikit               | 1974               | 100.5286  | 17.8078  | 0.79           | 9.59      |
| Lamphraphloeng        | 1967               | 101.785   | 14.537   | 0.78           | 16.67     |
| Khao_Laem             | 1985               | 98.52     | 14.8817  | 0.77           | 18.19     |
| Nam_Pung              | 1965               | 103.966   | 16.969   | 0.77           | 20.75     |
| Kaengkrachan          | 1966               | 99.6114   | 12.9032  | 0.75           | 9.87      |
| Tabsalao              | 1988               | 99.433    | 15.541   | 0.71           | 16.1      |
| Lam_Pao               | 1969               | 103.44    | 16.654   | 0.7            | 16.91     |
| Nam_Oun               | 1973               | 103.7467  | 17.2971  | 0.65           | 10.31     |
| Mae_Kuang             | 1991               | 99.1204   | 18.9294  | 0.59           | 13.16     |
| Lamtakhong            | 1969               | 101.535   | 14.821   | 0.58           | 16.4      |
| Mae_Ngat              | 1985               | 99.0382   | 19.1685  | 0.56           | 33.5      |
| Khun_Dan_Prakan_Chon  | 2004               | 101.3241  | 14.3071  | 0.53           | 20.19     |
| Pranburi              | 1978               | 99.7833   | 12.4615  | 0.48           | 25.82     |
| Chulabhorn            | 1972               | 101.636   | 16.539   | 0.4            | 27.49     |
| Bang_Lang             | 1981               | 101.271   | 6.146    | 0.24           | 24.59     |
| Rajjaprabha           | 1987               | 98.7664   | 9.004    | 0.01           | 31.69     |
| Bhumibol              | 1964               | 98.9024   | 17.2569  | 0              | 27.52     |

**Table S2. List of reservoirs used in the indirect validation and corresponding validation performance. Note that the reservoirs are listed in decreasing order of R<sup>2</sup>.**

| <b>Name of the reservoir</b> | <b>Year of commission</b> | <b>Longitude</b> | <b>Latitude</b> | <b>R<sup>2</sup></b> | <b>nRMSE (%)</b> |
|------------------------------|---------------------------|------------------|-----------------|----------------------|------------------|
| <b>Xe_Kaman1</b>             | 2016                      | 107.174          | 14.97           | 0.97                 | 6.43             |
| <b>Nuozhadu</b>              | 2014                      | 100.37           | 22.676          | 0.96                 | 6.43             |
| <b>Theun_Hinboun_Exp</b>     | 2013                      | 104.66           | 18.315          | 0.95                 | 20.54            |
| <b>Khao_Laem</b>             | 1985                      | 98.52            | 14.8817         | 0.93                 | 8.02             |
| <b>Ubol_Ratana</b>           | 1966                      | 102.587          | 16.758          | 0.92                 | 5.3              |
| <b>Sirindhorn</b>            | 1971                      | 105.389          | 15.133          | 0.89                 | 11.07            |
| <b>Moby</b>                  | 1971                      | 97.0434          | 19.8716         | 0.87                 | 4.66             |
| <b>Thac_Mo</b>               | 1995                      | 107.0624         | 11.8406         | 0.79                 | 11.31            |
| <b>Lam_Pao</b>               | 1969                      | 103.44           | 16.654          | 0.78                 | 24.26            |
| <b>Xiaowan</b>               | 2010                      | 99.95            | 24.745          | 0.71                 | 14.36            |
| <b>Sesan4</b>                | 2009                      | 107.5064         | 13.975          | 0.7                  | 8.04             |
| <b>Sirikit</b>               | 1974                      | 100.5286         | 17.8078         | 0.68                 | 17.69            |
| <b>Taungnawin</b>            | 1996                      | 95.5858          | 18.9231         | 0.58                 | 29.07            |
| <b>Dachaoshan</b>            | 2003                      | 100.505          | 24.128          | 0.49                 | 10.53            |
| <b>Gongguoqiao</b>           | 2012                      | 99.331           | 25.589          | 0.47                 | 15.92            |
| <b>Kinda</b>                 | 1985                      | 96.3113          | 21.1581         | 0.35                 | 18.39            |
| <b>Bang_Lang</b>             | 1981                      | 101.271          | 6.146           | 0.28                 | 16.61            |
| <b>Nam_Ngum2</b>             | 2012                      | 102.797          | 18.846          | 0.12                 | 10.58            |
| <b>Rajjaprabha</b>           | 1987                      | 98.7664          | 9.004           | 0.1                  | 16               |
| <b>Manwan</b>                | 1992                      | 100.42           | 24.659          | 0                    | 12.05            |
